# Supplementary material
Source: PubMed Central journal article supplement (PMC6485256)
Supplement: NIHMS1023887-supplement-SI.pdf [file NIHMS1023887-supplement-SI.pdf]

## Supporting Information

# Biodistribution of Filamentous Plant Virus Nanoparticles: Pepino Mosaic Virus versus Potato Virus X

*Duc H. T. Le,<sup>¶</sup> Eduardo Méndez-López,<sup>§</sup> Chao Wang,<sup>†,¶</sup> Ulrich Commandeur,<sup>⊥</sup> Miguel A. Aranda,<sup>§</sup> Nicole F. Steinmetz\*<sup>†,‡,¥,&,¶</sup>*

<sup>†</sup> Department of NanoEngineering, University of California, San Diego, La Jolla, CA 92093, USA

<sup>¥</sup> Moores Cancer Center, University of California, San Diego, La Jolla, CA 92093, USA

<sup>‡</sup> Department of Radiology, University of California, San Diego, La Jolla, CA 92093, USA

<sup>&</sup> Department of BioEngineering, University of California, San Diego, La Jolla, CA 92093, USA

<sup>¶</sup> Department of Biomedical Engineering, Case Western Reserve University School of Medicine, Cleveland, OH 44106, USA

<sup>§</sup> Centro de Edafología y Biología Aplicada del Segura (CEBAS)-CSIC, Campus Universitario de Espinardo, 30100 Murcia, Spain

<sup>⊥</sup> Department of Molecular Biology, RWTH-Aachen University, Aachen 52064, Germany

\*Correspondence: [nsteinmetz@ucsd.edu](mailto:nsteinmetz@ucsd.edu)

<sup>¶</sup> Present address: (D.H.T.L.) Eindhoven University of Technology, P.O. Box 513 (STO 3.25), 5600MB Eindhoven, The Netherlands; Department of Biochemistry, Radboudumc, Geert Grooteplein 28, 6525 GA Nijmegen, The Netherlands

The sequences of PepMV vs. PVX. The first 20 aa corona sequences are highlighted in red; these sequences were further analyzed, see Figure S1 and Table S1.

### **PepMV**

10                    20                    30                    40                    50                    60  
MPDTTPVAAT SSAPPTAKDA GAKAPSDFSN PNTAPSLSDL KVKYVSTVT SVATPAEIEA

70                    80                    90                    100                    110                    120  
LGKIFTAMGL AANETGPAMW DLARAYADVQ SSKSAQLIGA TPSNPALSRR ALAAQFDRIN

130                    140                    150                    160                    170                    180  
ITPRQFCMYF AKVVWNILLD SNIPPANWAK LGYQEDTKFA AFDFFDGVTN PASLQPADGL

190                    200                    210                    220                    230  
IRQPNEKELA AHSVAKYGAL ARQKISTGNY ITTLGEVTRG HMGGANTMYA IDAPPEL

### **PVX**

10                    20                    30                    40                    50                    60  
MSAPASTTQA TGSTTSTTK TAGATPATAS GLFTIPDGDF FSTARAVVAS DAVATNEDLS

70                    80                    90                    100                    110                    120  
EIEAVWKDMK VPTDTMAQAA WDLVRHCADV GSSAQTEMID TGPYSNGISR ARLAAAIKEV

130                    140                    150                    160                    170                    180  
CTLRQFCMKY APVVWNWMLT NNSPPANWQA QGFKPEHKFA AFDFFNQVTN PAAIMPKEGL

190                    200                    210                    220                    230  
IRPPSEAEMN AAQTAAFVKI TKARAQSNDF ASLDAVTRG RITGTTTAEA VVTLPPP

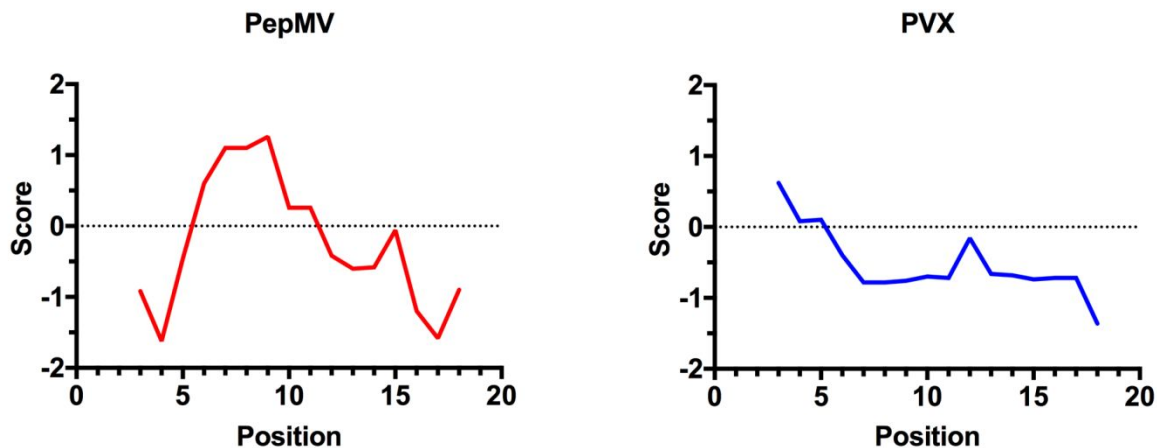

**Figure S1.** Hydropathy plots, based on the Kyte-Doolittle scale, of the first 20 amino acid sequences in PepMV and PVX CP illustrating the hydrophobicity distribution from each residue. The window size was set at 5.

**Table S1.** Summary of 20-mer peptide tails (Calculated by Protein Calculator tool and EXPASY)

|                                         | PepMV  | PVX    |
|-----------------------------------------|--------|--------|
| pI                                      | 4.47   | 8.88   |
| Estimated charge at pH 7.4              | -1.2   | 0.8    |
| % acidic residues                       | 10 %   | 0%     |
| % basic residues                        | 5%     | 5%     |
| % hydrophobic residues                  | 55%    | 25%    |
| % neutral residues                      | 30%    | 70%    |
| Grand average of hydropathicity (GRAVY) | -0.330 | -0.545 |

GRAVY: a value for a protein or a peptide is calculated by adding the hydropathy values (Kyte, J. and Doolittle, R.F., 1982) of each amino acid residues and dividing by the number of residues in the sequence or length of the sequence. A positive GRAVY value indicates that the protein is hydrophobic and a negative value indicates that it is hydrophilic. The score is calculated based on the Kyte-Doolittle scale.
